# Supplementary material for: Occupational and Individual Determinants of Work-life Balance among Office Workers with Flexible Work Arrangements
Source: PubMed Central journal article supplement (PMC7068342; doi:10.3390/ijerph17041418), 2020-02-22
Supplement: ijerph-17-01418-s001.pdf [file ijerph-17-01418-s001.pdf]

## DETERMINANTS OF WORK-LIFE BALANCE

### Supplementary material

#### *Occupational and Individual Determinants of Work-life Balance among Office Workers with Flexible Work Arrangements*

Table 1. Description over included questions in all independent variables, used in the present study.

| Variables                            | Scale                                                                              | Included questions                                                                                                                                                                                                                                                                                                                                                                          |
|--------------------------------------|------------------------------------------------------------------------------------|---------------------------------------------------------------------------------------------------------------------------------------------------------------------------------------------------------------------------------------------------------------------------------------------------------------------------------------------------------------------------------------------|
| Organizational factors               |                                                                                    |                                                                                                                                                                                                                                                                                                                                                                                             |
| Work arrangement                     | Categorical; Flex-time/<br>non-regulated working<br>hours / other work<br>solution | Which employment status do you have?                                                                                                                                                                                                                                                                                                                                                        |
| Information about organizing work    | 0 (not at all) to 4 (to a very<br>high extent)                                     | Do you feel that the Swedish Transport administration (STA) has given you information, (e.g. through your manager), about:<br>1) How to handle advantages and disadvantages with flexible work?<br>2) What tasks to prioritize when your time is insufficient?<br>3) What result you should achieve with your work?<br>4) Special ways on how your work should be performed and if so, how? |
| Unclear guidelines for flexible work | 0 (completely incorrect) to<br>4 (completely correct)                              | In my work-place we have:<br>1) A need for clearer guidelines from STA on work outside regular working hours (e.g. during evenings).<br>2) A need for clearer guidelines from STA on work at other places than the office (e.g. from home).                                                                                                                                                 |
| Office type                          | Categorical; Cell-office<br>/activity based office /open<br>plan office            | What type of office do you work in?                                                                                                                                                                                                                                                                                                                                                         |
| Leadership behavior                  |                                                                                    |                                                                                                                                                                                                                                                                                                                                                                                             |
| Relation-oriented leadership         | 1 (completely incorrect) to<br>6 (completely correct)                              | 1) My manager is considerate.<br>2) My manager shows regard for us employees as individuals.<br>3) My manager delegates responsibility and authority.<br>4) My manager socializes with us employees to build relationships.<br>5) My manager trust us employees.                                                                                                                            |
| Structured-oriented leadership       | 1 (completely incorrect) to<br>6 (completely correct)                              | 1) My manager formulates clear and substantial goals for the work.<br>2) My manager allocates work to groups and individuals in a clear way.<br>3) My manager closely follows-up and controls performed work.<br>4) My manager gives clear instructions on how to do the work.<br>5) My manager makes a point of following rules and principles.                                            |

## DETERMINANTS OF WORK-LIFE BALANCE

|                                            |                                                    |                                                                                                                                                                                                                                                                                                                                                                                                                                                                                                                                                                                                                                                                                                                                                                                                                                                                                                                                                                                                                                                                  |
|--------------------------------------------|----------------------------------------------------|------------------------------------------------------------------------------------------------------------------------------------------------------------------------------------------------------------------------------------------------------------------------------------------------------------------------------------------------------------------------------------------------------------------------------------------------------------------------------------------------------------------------------------------------------------------------------------------------------------------------------------------------------------------------------------------------------------------------------------------------------------------------------------------------------------------------------------------------------------------------------------------------------------------------------------------------------------------------------------------------------------------------------------------------------------------|
| Change-oriented leadership                 | 1 (completely incorrect) to 6 (completely correct) | <ol style="list-style-type: none"> <li>1) My manager tests new work methods to improve the ability to achieve our organizational goals.</li> <li>2) My manager has and communicates visions of the future.</li> <li>3) My manager encourages development, innovation and learning.</li> <li>4) My manager encourages discussions of new ideas and suggestions.</li> <li>5) My manager starts development projects.</li> </ol>                                                                                                                                                                                                                                                                                                                                                                                                                                                                                                                                                                                                                                    |
| Psychosocial factors                       |                                                    |                                                                                                                                                                                                                                                                                                                                                                                                                                                                                                                                                                                                                                                                                                                                                                                                                                                                                                                                                                                                                                                                  |
| Expectations to work more than agreed      | 0 (not at all) to 4 (to a very high extent)        | <ol style="list-style-type: none"> <li>1) Do your colleagues expect you to work more than agreed?</li> <li>2) Does your manager expect you to work more than agreed?</li> <li>3) Do you expect yourself to answer e-mails, phone calls and/or text messages outside regular working hours?</li> <li>4) Do you expect yourself to work more than agreed?</li> </ol>                                                                                                                                                                                                                                                                                                                                                                                                                                                                                                                                                                                                                                                                                               |
| Expectations of availability               | 0 (not at all) to 4 (to a very high extent)        | <p>How well do the following questions fits you and your work situation?</p> <ol style="list-style-type: none"> <li>1) Do you experience expectations of availability from your manager or colleagues during evenings after regular working hours?</li> <li>2) Are there expectations from my colleagues that I should reply to e-mails, telephone calls and/or SMS outside regular working hours?</li> <li>3) Do you experience expectations of availability from your manager or colleagues during non-working days?</li> <li>4) Do you experience expectations of availability from your manager or colleagues in the morning before regular working hours?</li> <li>5) Do you experience expectations of availability from your manager or colleagues during vacation or parental leave?</li> <li>6) Do you experience expectations of availability from your manager or colleagues during breaks at work?</li> <li>7) Are there expectations from my manager that I should answer emails, telephone calls and/or SMS outside reg. working hours?</li> </ol> |
| Clarity of expectations about availability | 0 (not at all) to 4 (to a very high extent)        | <ol style="list-style-type: none"> <li>1) Are my colleagues clear with their expectations of answers outside regular working hours?</li> <li>2) Is my manager clear with expectations of answers outside regular working hours?</li> <li>3) Am I clear with my expectations of answers outside regular working hours?</li> </ol>                                                                                                                                                                                                                                                                                                                                                                                                                                                                                                                                                                                                                                                                                                                                 |
| Quantitative job demands                   | 1 (never/almost never) to 5 (always)               | <ol style="list-style-type: none"> <li>1) Do you get behind with your work?</li> <li>2) How often do you not have time to complete all your work tasks?</li> <li>3) Do you have enough time for your work tasks?</li> <li>4) Is your workload unevenly distributed so it piles up?</li> </ol>                                                                                                                                                                                                                                                                                                                                                                                                                                                                                                                                                                                                                                                                                                                                                                    |
| Influence at work                          | 1 (never/almost never) to 5 (always)               | <ol style="list-style-type: none"> <li>1) Can you influence the amount of work assigned to you?</li> <li>2) Do you have any influence on what you do at work?</li> <li>3) Do you have a large degree of influence concerning your work?</li> <li>4) Do you have a say in choosing who you work with?</li> </ol>                                                                                                                                                                                                                                                                                                                                                                                                                                                                                                                                                                                                                                                                                                                                                  |
| Social community at work                   | 1 (never/almost never) to 5 (always)               | <ol style="list-style-type: none"> <li>1) Do you feel part of a community at your place of work?</li> <li>2) Is there a good atmosphere between you and your colleagues?</li> <li>3) Is there good co-operation between the colleagues at work?</li> </ol>                                                                                                                                                                                                                                                                                                                                                                                                                                                                                                                                                                                                                                                                                                                                                                                                       |
| Social support from colleagues             | 1 (never/almost never) to 5 (always)               | <ol style="list-style-type: none"> <li>1) How often do your colleagues talk with you about how well you carry out your work?</li> <li>2) How often are your colleagues willing to listen to your problems at work?</li> <li>3) How often do you get help and support from your colleagues?</li> </ol>                                                                                                                                                                                                                                                                                                                                                                                                                                                                                                                                                                                                                                                                                                                                                            |

## DETERMINANTS OF WORK-LIFE BALANCE

|                                   |                                                                                                                                                                                               |                                                                                                                                                                                                                                                                                                                                                                                                                                                                                                                               |
|-----------------------------------|-----------------------------------------------------------------------------------------------------------------------------------------------------------------------------------------------|-------------------------------------------------------------------------------------------------------------------------------------------------------------------------------------------------------------------------------------------------------------------------------------------------------------------------------------------------------------------------------------------------------------------------------------------------------------------------------------------------------------------------------|
| Culture encouraging flexible work | 0 (completely incorrect) to 4 (completely correct)                                                                                                                                            | In my workplace, we have a culture encouraging flexible work.                                                                                                                                                                                                                                                                                                                                                                                                                                                                 |
| Individual behavior               |                                                                                                                                                                                               |                                                                                                                                                                                                                                                                                                                                                                                                                                                                                                                               |
| Overtime work (hours/week)        | Assessed in numbers rounded to the closest integer (calculated as the difference between the actual working hours and a normal working week (usually 40 working hours according to contracts) | Estimate how many hours you work per week.                                                                                                                                                                                                                                                                                                                                                                                                                                                                                    |
| Over commitment                   | 1 (completely incorrect) to 4 (completely correct)                                                                                                                                            | <ol style="list-style-type: none"> <li>1) I get easily overwhelmed by time pressure at work.</li> <li>2) As soon as I get up in the morning I start thinking about work problems.</li> <li>3) When I get home, I can easily relax and "switch off" work.</li> <li>4) People close to me say I sacrifice too much for my job.</li> <li>5) Work rarely lets me go, it is still on my mind when I go to bed.</li> <li>6) If I postpone something that I was supposed to do today I'll have trouble sleeping at night.</li> </ol> |
| Boundary management               | 0 (completely incorrect) to 4 (completely correct)                                                                                                                                            | I can by myself: <ol style="list-style-type: none"> <li>1) Control if I can keep my work and my privacy separate</li> <li>2) Control if I have clear boundaries between my work and my private life</li> <li>3) Control if I can combine my work and my privacy during the day and week</li> </ol>                                                                                                                                                                                                                            |
| Interaction variable              |                                                                                                                                                                                               |                                                                                                                                                                                                                                                                                                                                                                                                                                                                                                                               |
| Perceived flexibility             | 0 (completely incorrect) to 4 (completely correct)                                                                                                                                            | I can by myself: <ol style="list-style-type: none"> <li>1) Decide where I perform my work</li> <li>2) Decide what time I work a certain day</li> <li>3) Decide when different tasks should be performed</li> <li>4) Decide how my work should be performed</li> </ol>                                                                                                                                                                                                                                                         |
